# Supplementary material for: MTCH2 promotes the malignant progression of ovarian cancer through the upregulation of AIMP2 expression levels, mitochondrial dysfunction and by mediating energy metabolism
Source: PubMed Central journal article supplement — Oncol Lett. 2024 Aug 12;28(4):492. doi: 10.3892/ol.2024.14625 (PMC11342418; doi:10.3892/ol.2024.14625), 2024-08-12

Figure S1. Representative images of the IHC scoring of the tumor samples. Magnification, x400. MTCH2, mitochondrial carrier homology 2; AIMP2, aminoacyl transfer RNA synthetase-interacting multifunctional protein 2.

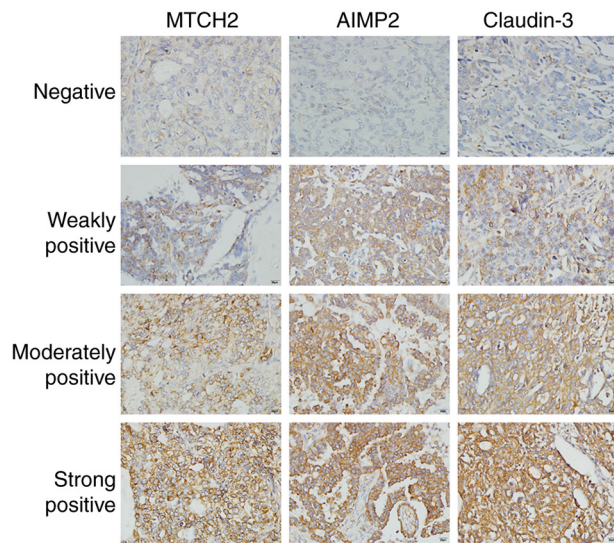

Figure S2. Effects of AIMP2 knockdown on claudin-3 expression were determined using western blotting. (A) Representative images of western blot assay in SK-OV-3 cells transfected with NC-siRNA, AIMP2 siRNA1, AIMP2 siRNA2, AIMP2 siRNA3. (B) Quantification of the relative expression of claudin-3 in these groups. \* $P < 0.05$  and \*\*\* $P < 0.001$ . AIMP2, aminoacyl transfer RNA synthetase-interacting multifunctional protein 2; NC, negative control; siRNA, small interfering RNA.

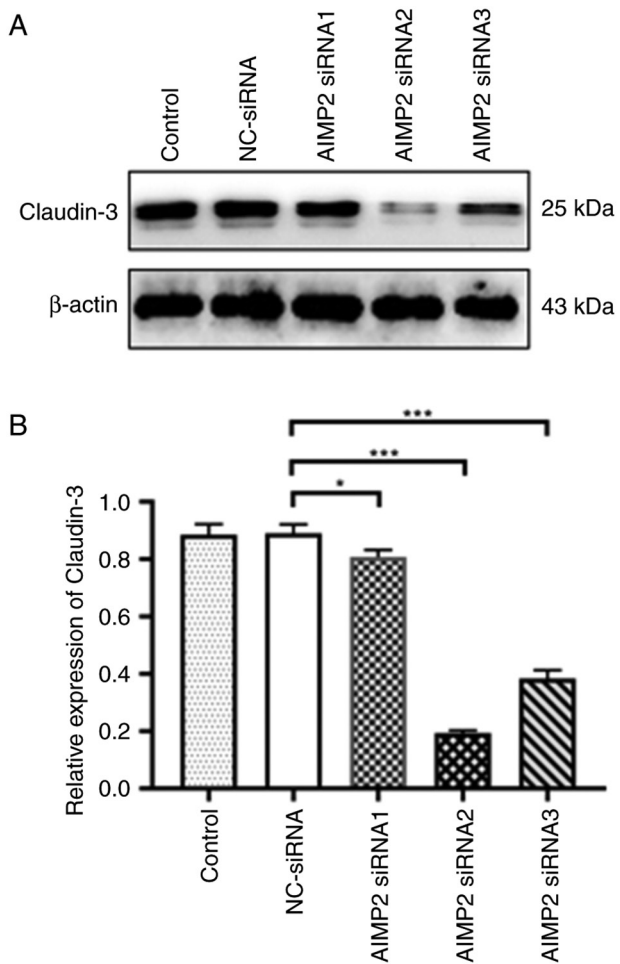

Supplement: Supplementary_Data.pdf [file Supplementary_Data.pdf]
